# Supplementary material for: A novel synthetic approach to poly(hydrosiloxane)s via hydrolytic oxidation of primary organosilanes with a AuNPs-stabilized Pickering interfacial catalyst
Source: Royal Society of Chemistry journal article supplement (doi:10.1039/c6ra25557d), 2016-12-24
Supplement: c6ra25557d1.pdf [file c6ra25557d1.pdf]

## Supporting information for

### **A novel synthetic approach to poly(hydrosiloxane)s *via* hydrolytic oxidation of primary organosilanes with AuNPs-stabilized Pickering interfacial catalyst**

Ravi Shankar, Bhawana Jangir, Asmita Sharma

Department of Chemistry, Indian Institute of Technology, Hauz Khas, New Delhi-110016

Correspondence to: [shankar@chemistry.iitd.ac.in](mailto:shankar@chemistry.iitd.ac.in)

#### **Index**

**Fig. S1.** GPC profiles during polymerization of iBA at different time intervals.

**Fig. S2.** Plot of molecular weight ( $M_n$ ) vs % conversion for the ATRP of iBA.

**Fig. S3:**  $^1\text{H}$  NMR spectrum of (a) macroinitiator and (b) polymer 1.

**Fig. S4.** HRTEM image of AuNPs in chloroform.

**Fig. S5:** SAED pattern of AuNPs in chloroform.

**Fig. S6.** GC-MS spectrum of the intermediates formed after 2 h during the hydrolytic oxidation of phenylsilane.

**Fig. S7.** DSC profile of polymer 2.

**Fig. S8.**  $^1\text{H}$  NMR spectra at different time intervals during hydrolytic oxidation of hexylsilane.

**Fig. S9.** TGA profiles of polymer 2-6.

**Fig. S10.**  $^{29}\text{Si}\{^1\text{H}\}$  NMR spectrum of  $\text{H}_2\text{RSiO}[\text{HRSiO}]_n\text{SiRH}_2$ , 3-5.

**Fig. S11.** HRTEM image of AuNPs after first cycle of the reaction.

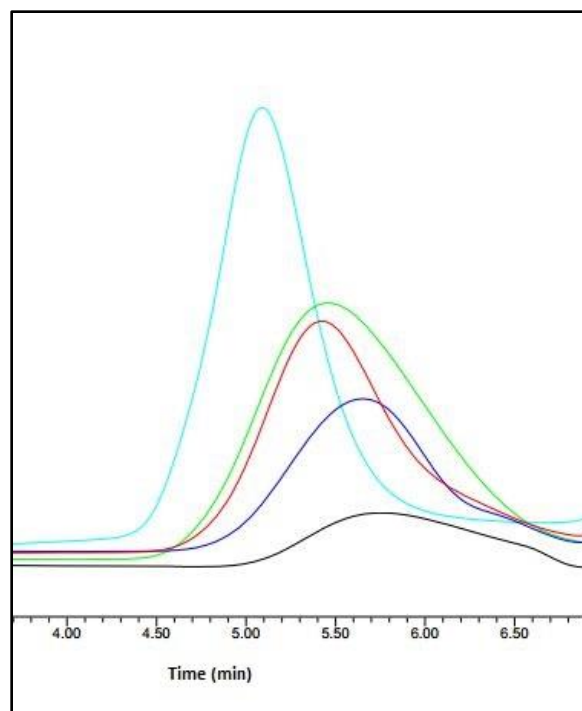

**Figure S1.** GPC profiles during polymerization of iBA at different time intervals.

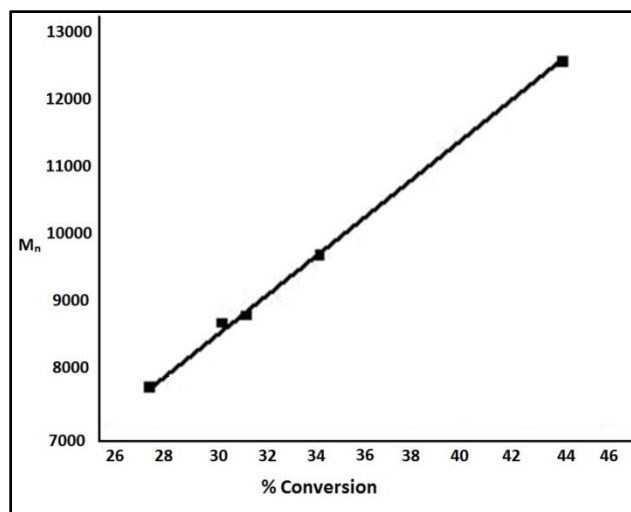

**Figure S2.** Plot of molecular weight ( $M_n$ ) vs % conversion for the ATRP of iBA.

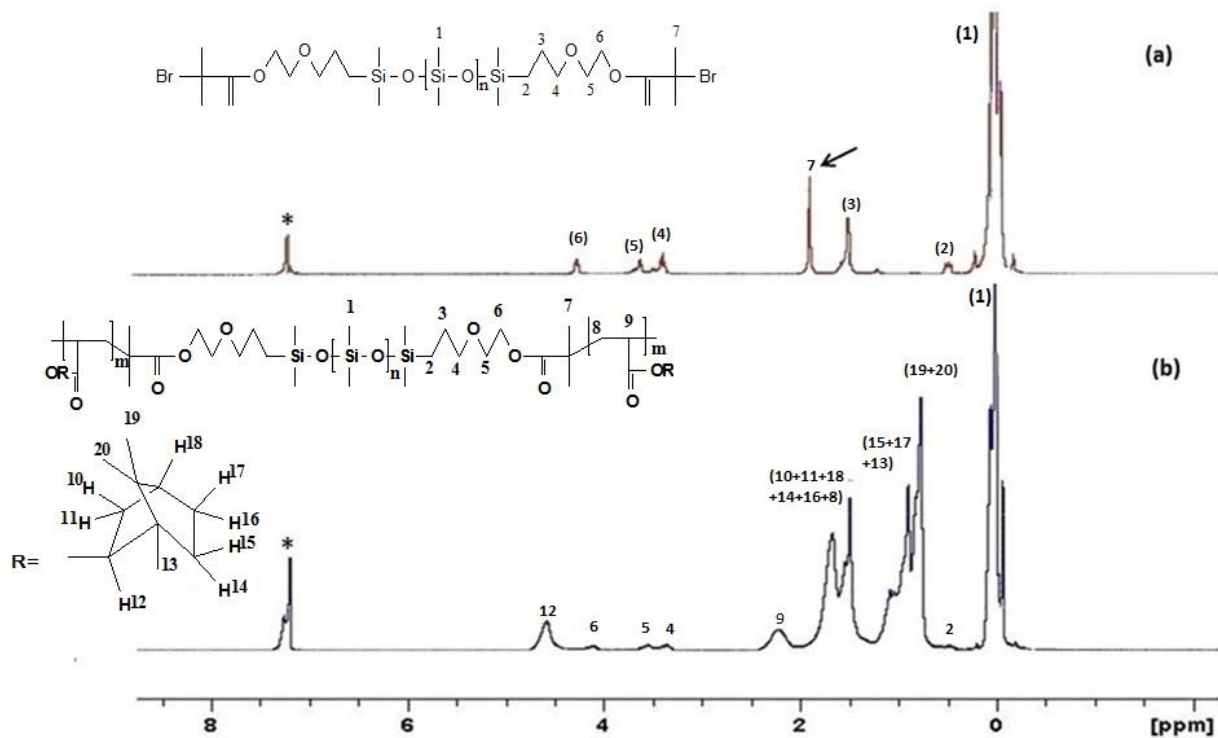

asterisk (\*) =  $\text{CDCl}_3$  peak

Figure S3:  $^1\text{H}$  NMR spectrum of (a) macroinitiator and (b) polymer 1.

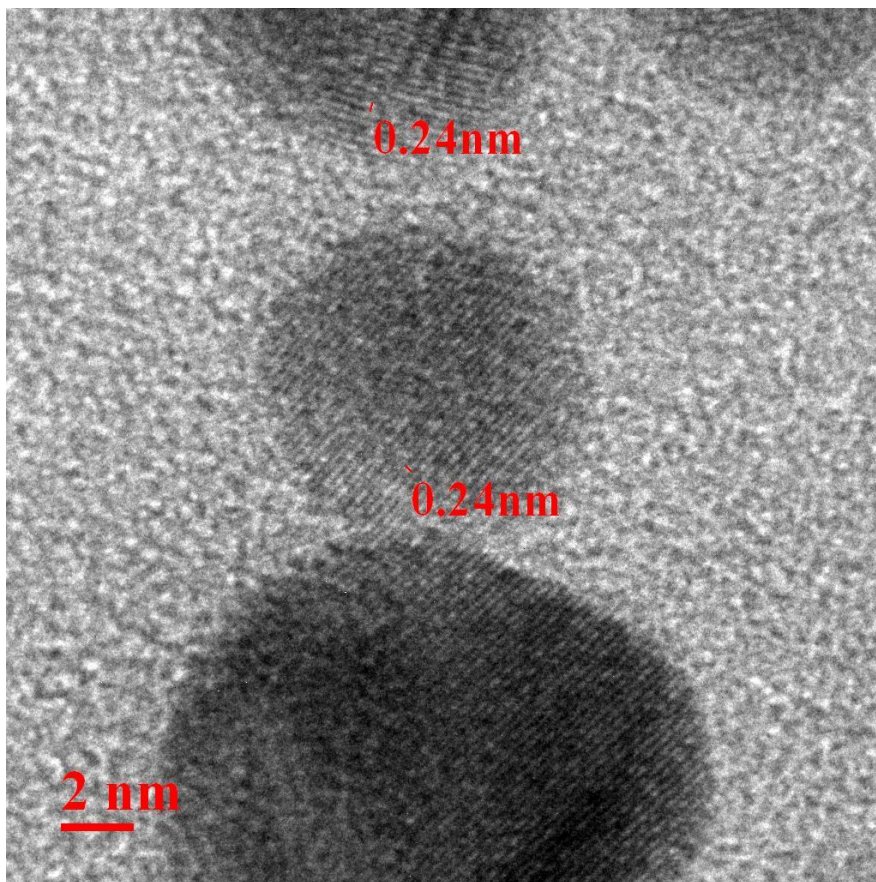

**Figure S4.** HRTEM image of AuNPs in chloroform.

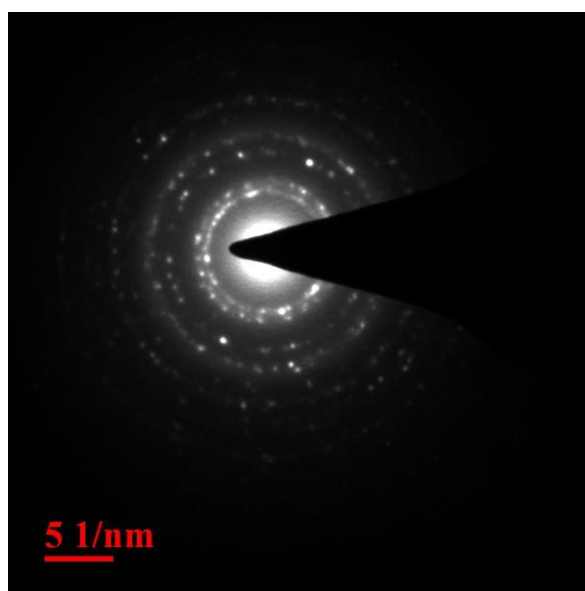

**Figure S5:** SAED pattern of AuNPs.

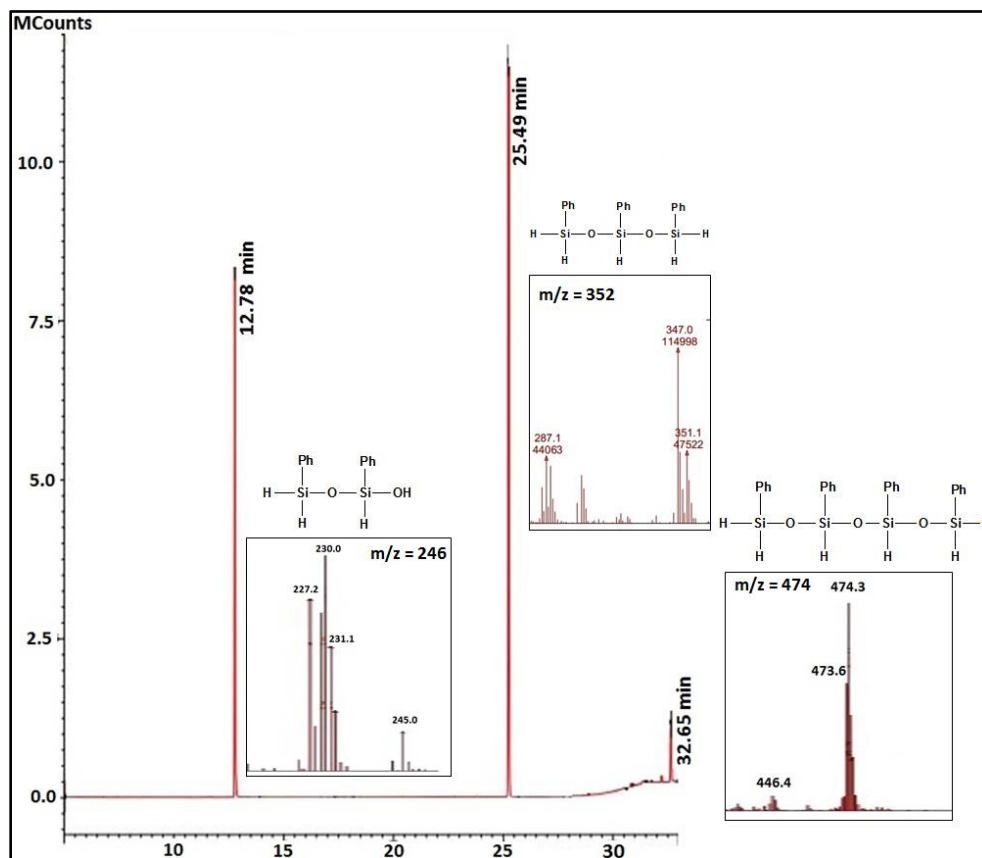

**Figure S6.** GC-MS spectrum of the intermediates formed after 2 h during the hydrolytic oxidation of phenylsilane.

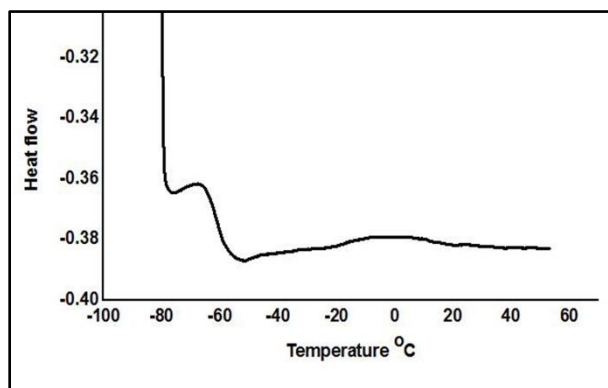

**Figure S7.** DSC profile of polymer 2.

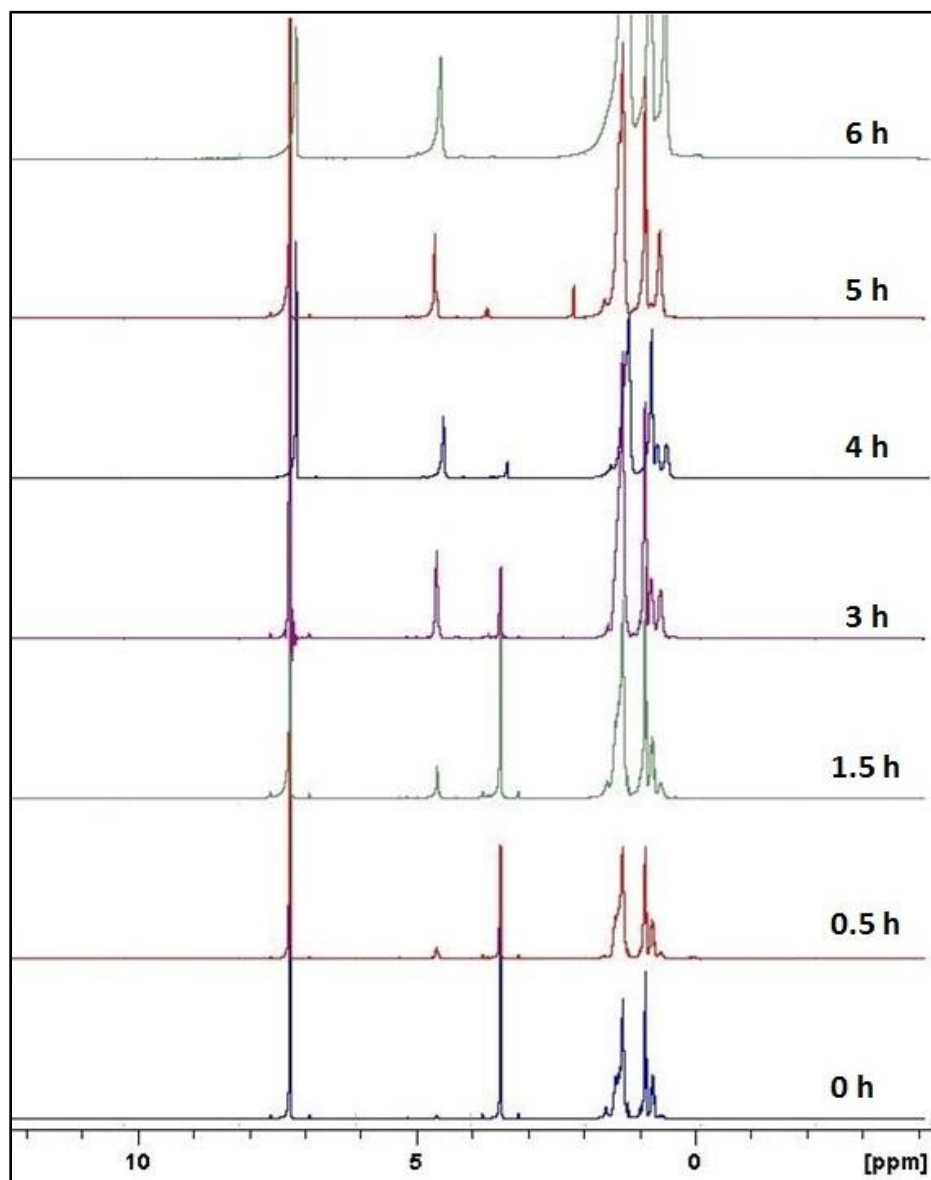

**Figure S8.**  $^1\text{H}$  NMR spectra at different time intervals during hydrolytic oxidation of hexylsilane.

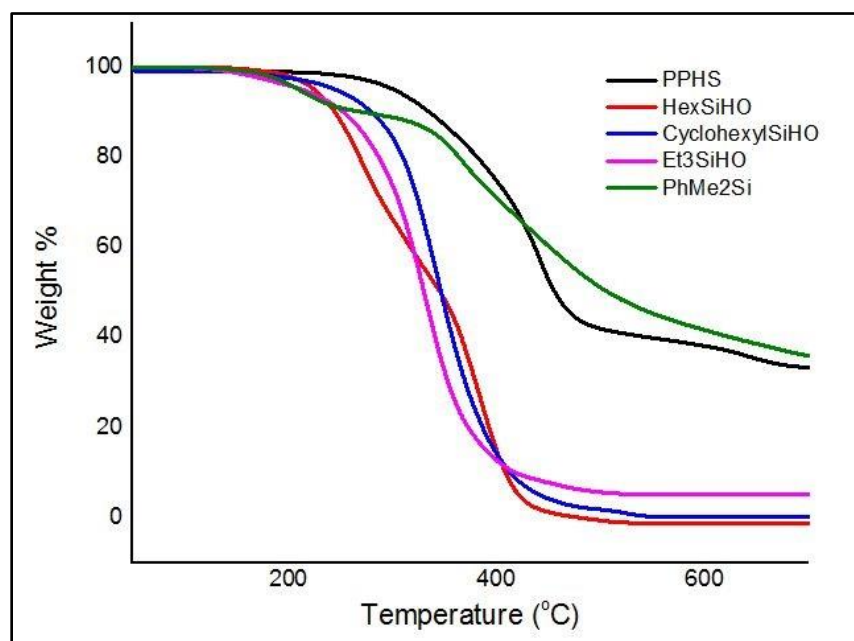

**Figure S9.** TGA profiles of polymer 2-6

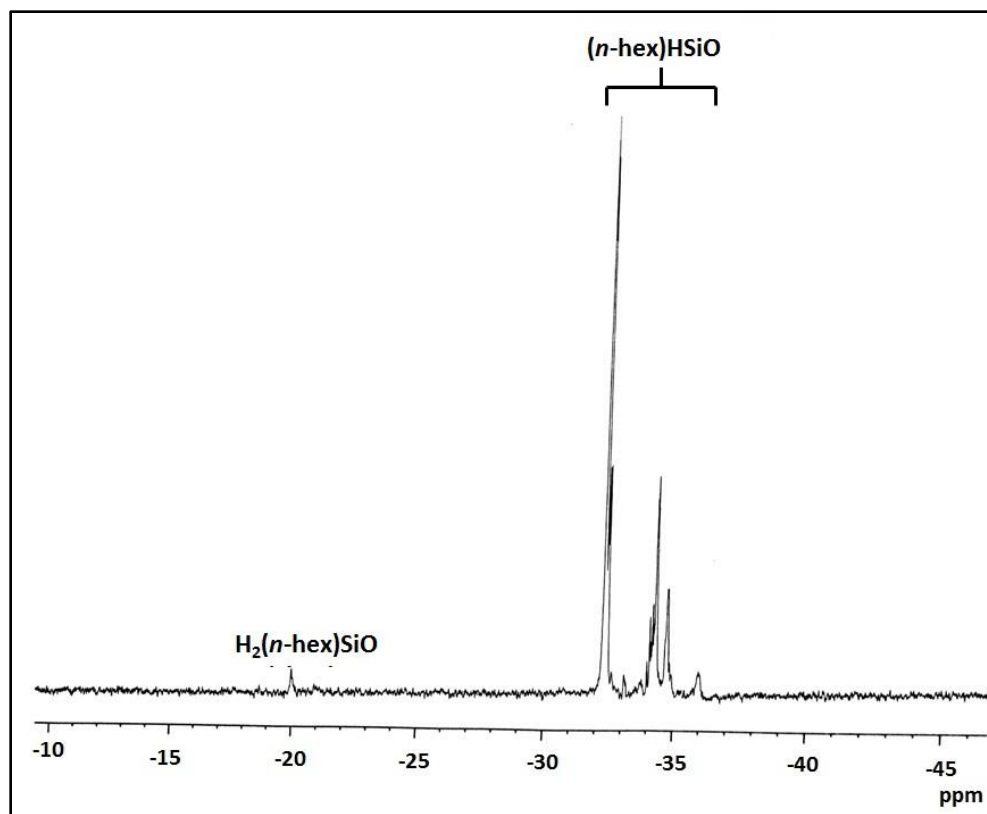

**Figure S10(a):**  $^{29}\text{Si}\{^1\text{H}\}$  NMR spectrum of  $\text{H}_2\text{RSiO}[\text{HRSiO}]_n\text{SiRH}_2$ , ( $\text{R} = n\text{-Hex}$ ), **3**.



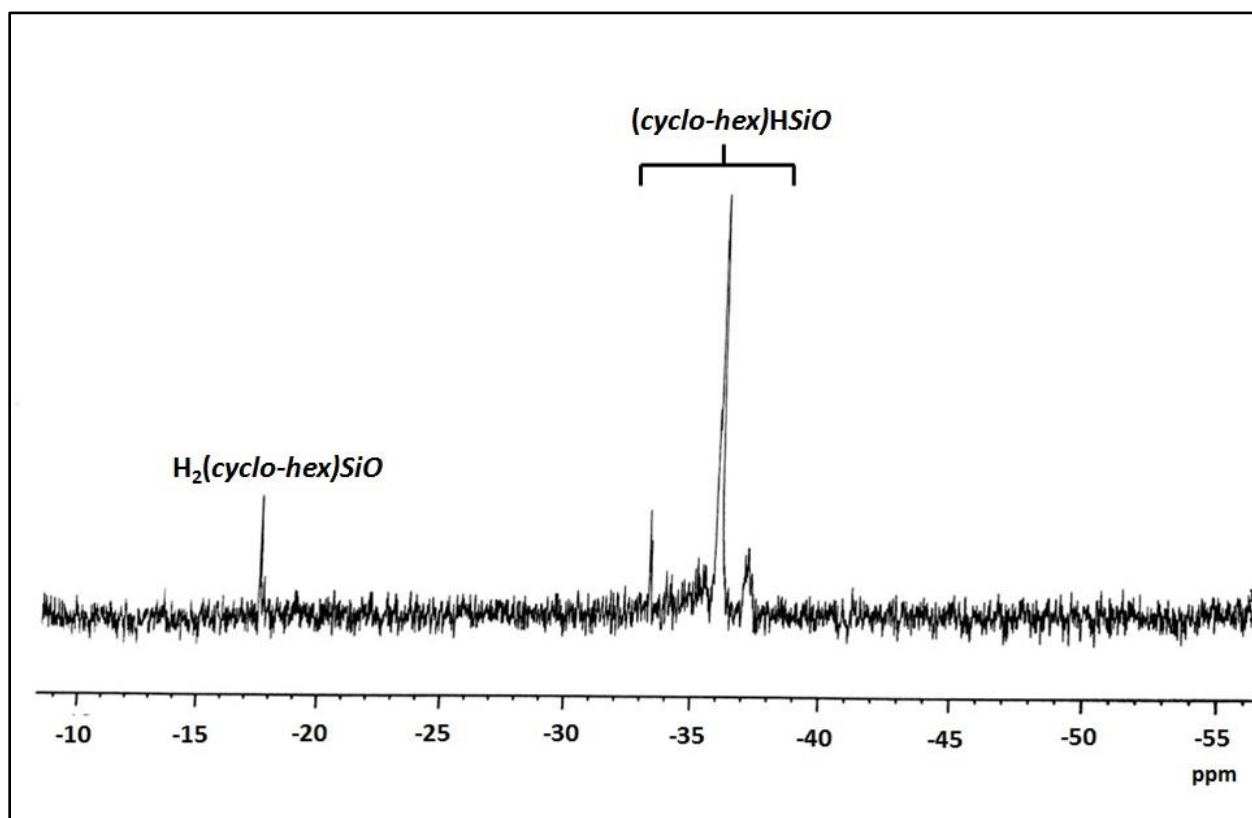

**Figure S10 (b):**  $^{29}\text{Si}\{^1\text{H}\}$  NMR of  $\text{H}_2\text{RSiO}[\text{HRSiO}]_n\text{SiRH}_2$  ( $\text{R} = \text{cyclo-Hex}$ ), **4**.

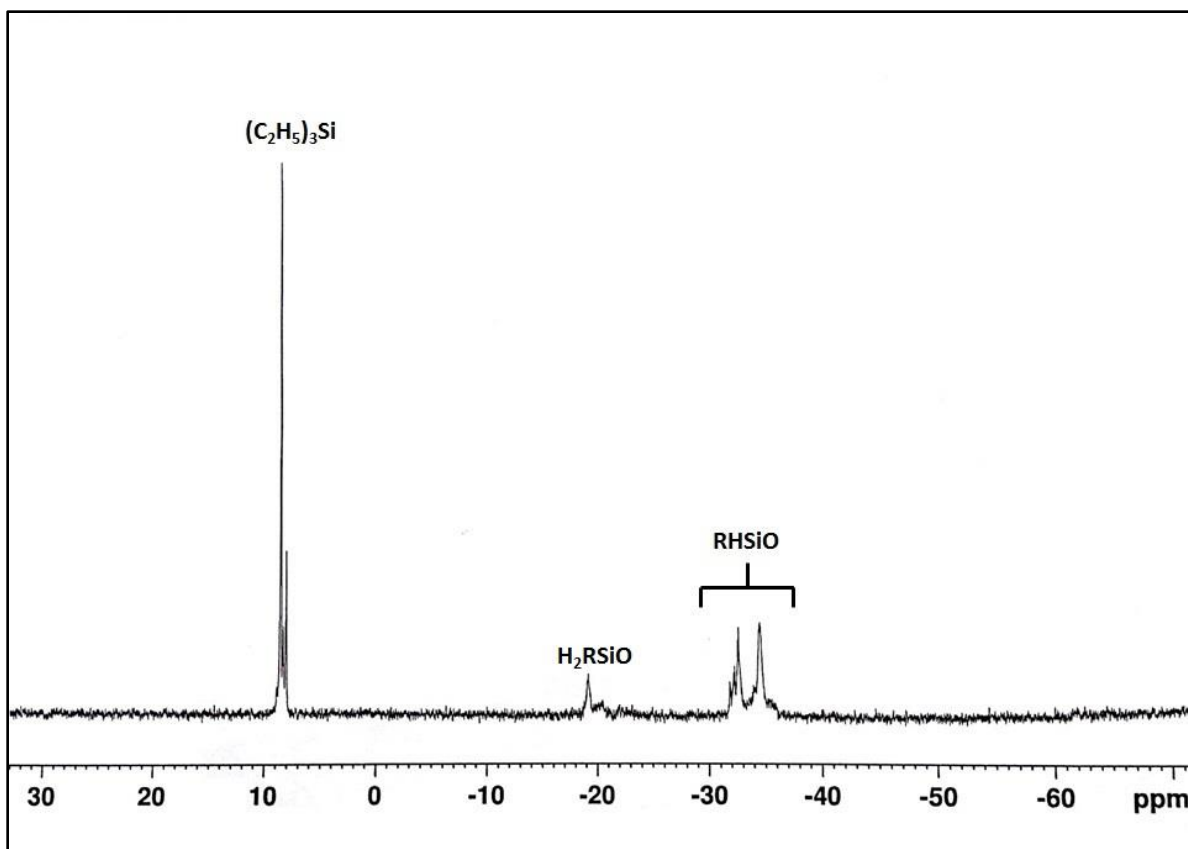

**Figure S10(c):**  $^{29}\text{Si}\{^1\text{H}\}$  NMR of  $\text{H}_2\text{RSiO}[\text{HRSiO}]_n\text{SiRH}_2$  ( $\text{R} = \text{Et}_3\text{SiCH}_2\text{CH}_2$ ), **5**

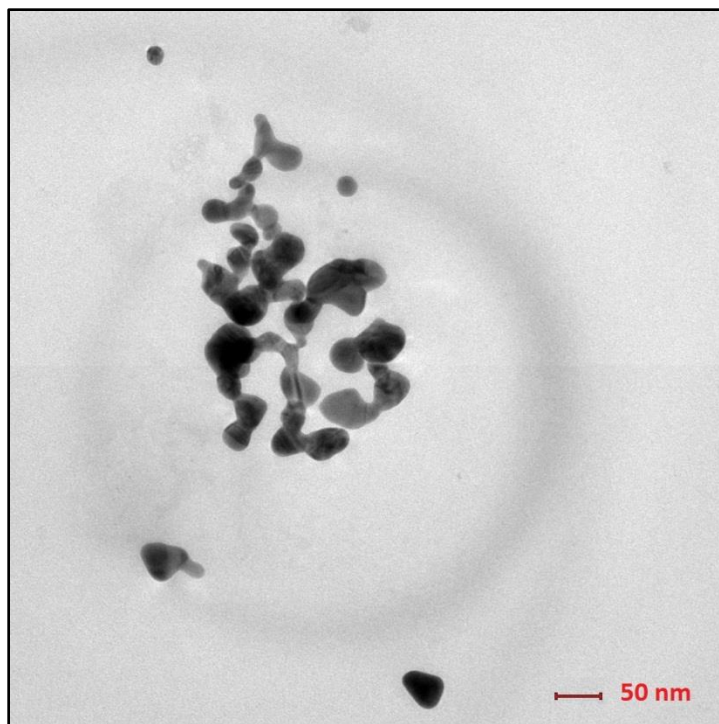

**Figure S11.** HRTEM image of AuNPs after first cycle of the reaction.
